# Supplementary material for: Rational Development of Liposomal Hydrogels: A Strategy for Topical Vaginal Antiretroviral Drug Delivery in the Context of HIV Prevention
Source: Pharmaceutics. 2019 Sep 18;11(9):485. doi: 10.3390/pharmaceutics11090485 (PMC6781289; doi:10.3390/pharmaceutics11090485)

# Supplementary Materials: Rational Development of Liposomal Hydrogels: A Strategy for Topical Vaginal Antiretroviral Drug Delivery in the Context of HIV Prevention

Maria J. Faria, Raul Machado, Artur Ribeiro, Hugo Gonçalves, Maria Elisabete C. D. Real Oliveira, Teresa Viseu, José das Neves and Marlene Lúcio

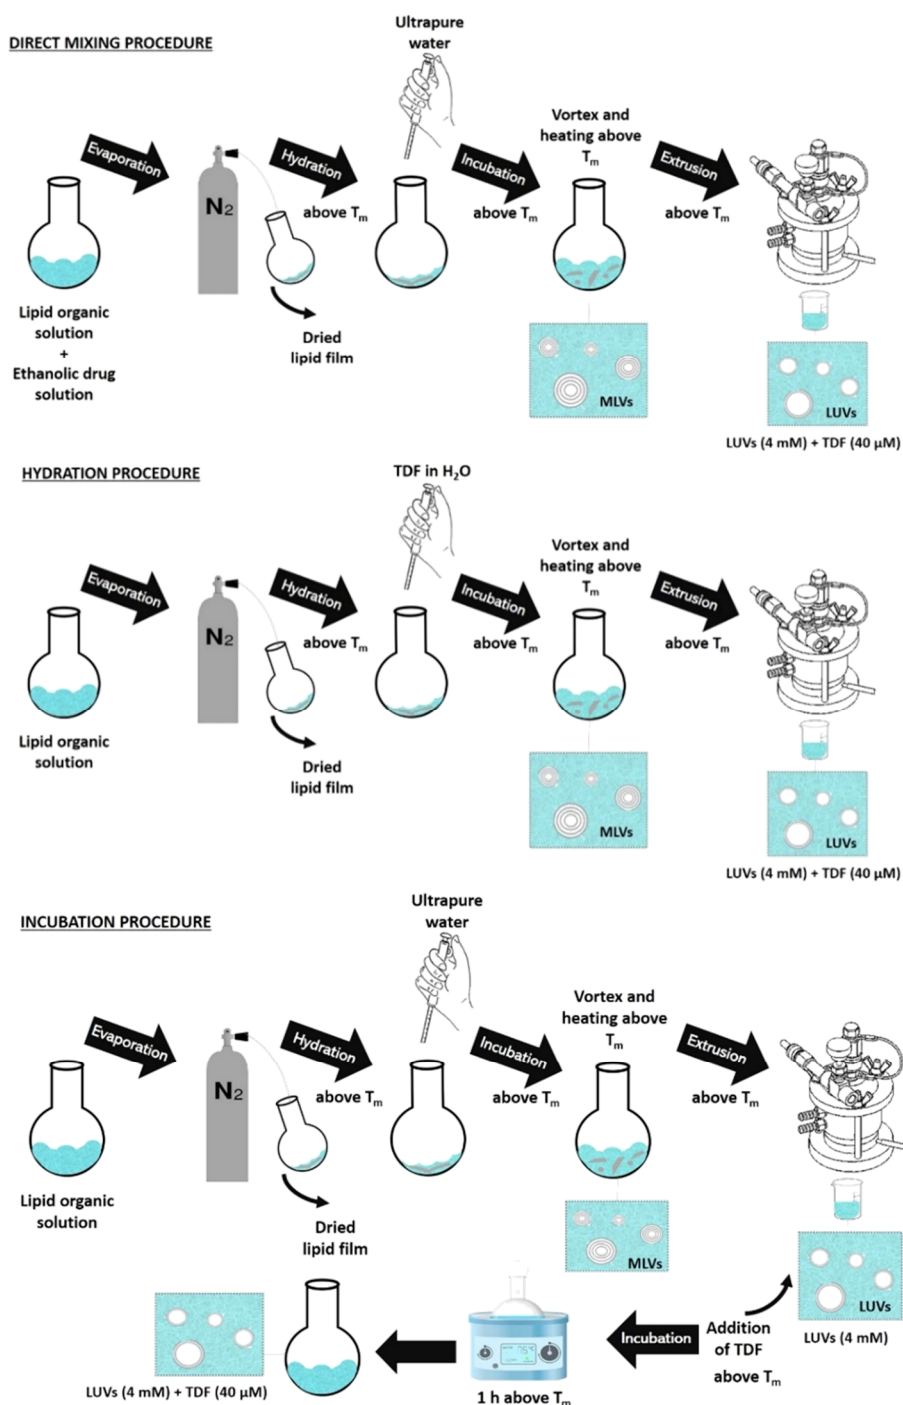

**Figure S1.** Schematic representation of encapsulation methods of TDF (final concentration 40  $\mu$ M) in zwitterionic liposomes (4 mM) with different degrees of membrane rigidity.

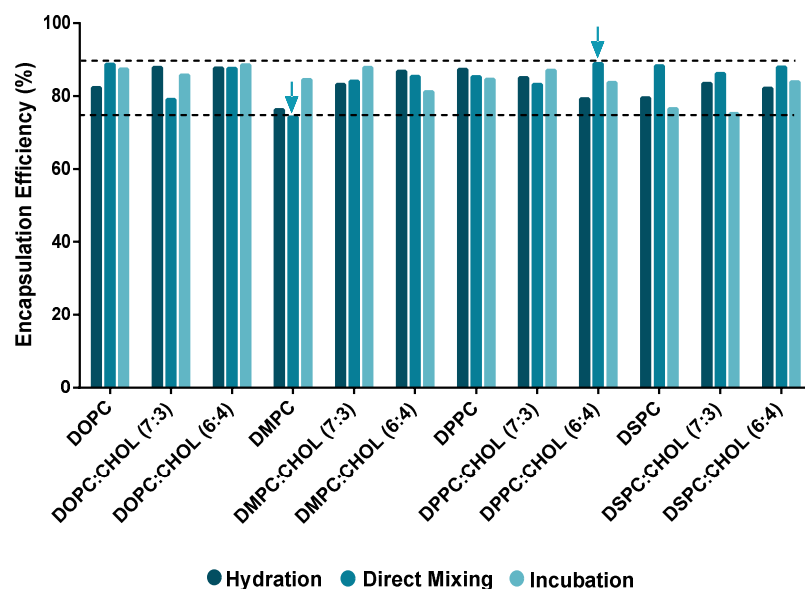

**Figure S2.** Encapsulation efficiency (EE %) of TDF (40  $\mu$ M) in liposomes with different degrees of membrane rigidity (4 mM) by three encapsulation methods: hydration, direct mixing and incubation. The dashed lines define the interval between the highest and lowest encapsulation efficiencies obtained.

**Table S1.** Main phase transition temperature ( $T_m$ ) and cooperativity of the phase transition (B) of the lipid formulations DMPC, DPPC and DSPC (4 mM) before and after TDF (40  $\mu$ M) encapsulation by three different methodologies (incubation, hydration and direct mixing).

| DMPC  |                      | DMPC+TDF             |                      |                      |
|-------|----------------------|----------------------|----------------------|----------------------|
|       |                      | Incubation           | Hydration            | Direct Mixing        |
| $T_m$ | $23.76 \pm 0.023$    | $23.96 \pm 0.02$     | $23.79 \pm 0.15$     | $22.28 \pm 0.41$     |
| B     | $857.70 \pm 37.56$   | $695.12 \pm 34.29$   | $514.99 \pm 146.57$  | $237.35 \pm 41.24$   |
| $R^2$ | 0.999                | 0.999                | 0.848                | 0.991                |
| DPPC  |                      | DPPC+TDF             |                      |                      |
|       |                      | Incubation           | Hydration            | Direct Mixing        |
| $T_m$ | $41.05 \pm 0.03$     | $41.19 \pm 0.05$     | $41.27 \pm 0.02$     | $41.49 \pm 0.03$     |
| B     | $2780.89 \pm 234.32$ | $4116.88 \pm 724.16$ | $3921.77 \pm 237.81$ | $3135.08 \pm 297.54$ |
| $R^2$ | 0.999                | 0.999                | 0.999                | 0.999                |
| DSPC  |                      | DSPC+TDF             |                      |                      |
|       |                      | Incubation           | Hydration            | Direct Mixing        |
| $T_m$ | $54.08 \pm 0.02$     | $54.198 \pm 0.07$    | $54.45 \pm 0.02$     | $54.07 \pm 0.02$     |
| B     | $4400.78 \pm 391.19$ | $3302.02 \pm 556.45$ | $6237.21 \pm 668.93$ | $4912.77 \pm 290.35$ |
| $R^2$ | 0.999                | 0.975                | 0.997                | 0.989                |

**Table S2 to S5.** Fitting of FTC release from hydrogel (HG) and TDF release from liposomes included in hydrogel (LH) in aqueous medium (37  $^{\circ}$ C).

**Table S2.** 1<sup>st</sup> Order kinetics.

| Mathematical Equation  | pH          | Adjusted Parameters                                   | $R^2$  | $R^2$ Adjusted |
|------------------------|-------------|-------------------------------------------------------|--------|----------------|
| $F_{max}(1 - e^{-kt})$ | HG with FTC | $F_{max} = 52.97 \pm 1.628$<br>$k = 1.597 \pm 0.1882$ | 0.9620 | 0.9585         |
|                        | LH with TDF | $F_{max} = 57.14 \pm 1.461$<br>$k = 0.5026 \pm 0.035$ | 0.9934 | 0.9928         |

$F_{max}$  is the total amount of drug released and k is the first order release constant.

Table S3. Korsmeyer–Peppas Model.

| Mathematical Equation | pH          | Adjusted Parameters                                | $R^2$  | $R^2$ Adjusted |
|-----------------------|-------------|----------------------------------------------------|--------|----------------|
| $at^n$                | HG with FTC | $a = 35.17 \pm 1.322$<br>$n = 0.2728 \pm 0.02555$  | 0.9598 | 0.9561         |
|                       | LH with TDF | $a = 22.72 \pm 0.9262$<br>$n = 0.5049 \pm 0.02603$ | 0.9875 | 0.9875         |

$a$  is a constant of geometric and structural incorporation that takes into account the pharmaceutical form;  $n$  is a release representing the mechanism of diffusion of the drug, being based on Fick's law, (a value of  $n$  equal to or less than 0.5 indicates a Fickian diffusion, for values between 0.5 and 1 indicates a non-Fickian diffusion).

Table S4. Weibull Model.

| Mathematical Equation | pH          | Adjusted Parameters                                                                 | $R^2$  | $R^2$ Adjusted |
|-----------------------|-------------|-------------------------------------------------------------------------------------|--------|----------------|
| $(1 - e^{(-at^b)})$   | HG with FTC | $a = 1.159 \pm 0.08798$<br>$F_{max} = 56.49 \pm 1.451$<br>$b = 0.6314 \pm 0.04353$  | 0.9945 | 0.9934         |
|                       | LH with TDF | $a = 0.7885 \pm 0.02721$<br>$F_{max} = 66.11 \pm 2.494$<br>$b = 0.4343 \pm 0.02335$ | 0.9990 | 0.9988         |

$F_{max}$  is the total amount of drug released and  $a$  is a parameter  $a$  that defines the time scale. The parameter  $b$  characterizes the shape of the curve. For ( $b = 1$ ) (Case 1), sigmoid, for ( $b > 1$ ) (Case 2) S-shaped, curvature upwards followed by a turning point, for parabolic ( $b < 1$ ) (Case 3) with greater initial slope and then exponential.

Table S5. - Higuchi Model.

| Mathematical Equation | pH          | Adjusted Parameters    | $R^2$  | $R^2$ Adjusted |
|-----------------------|-------------|------------------------|--------|----------------|
| $kt^{0,5}$            | HG with FTC | $k = 26.02 \pm 1.735$  | 0.7402 | 0.7402         |
|                       | LH with TDF | $k = 22.87 \pm 0.4112$ | 0.9885 | 0.9885         |

$K$  is the Higuchi dissolution constant.

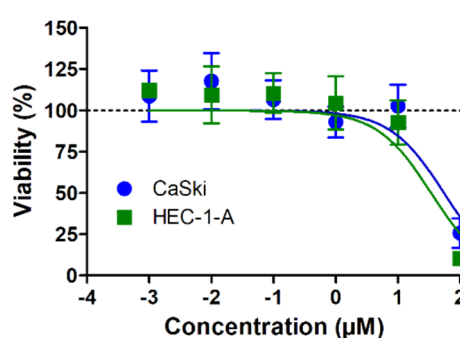

**Figure S3.** Viability of HEC-1-A and CaSki cells with increasing concentrations of TDF. Results are presented as mean  $\pm$  standard deviation values ( $n = 3$ ). Lines represent log-logistic regression fits.

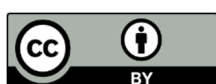

Supplement: Supplementary file 1 [file pharmaceutics-11-00485-s001.pdf]
